# Supplementary material
Source: PubMed Central journal article supplement (PMC3624623)

# Supplemental Figure 1

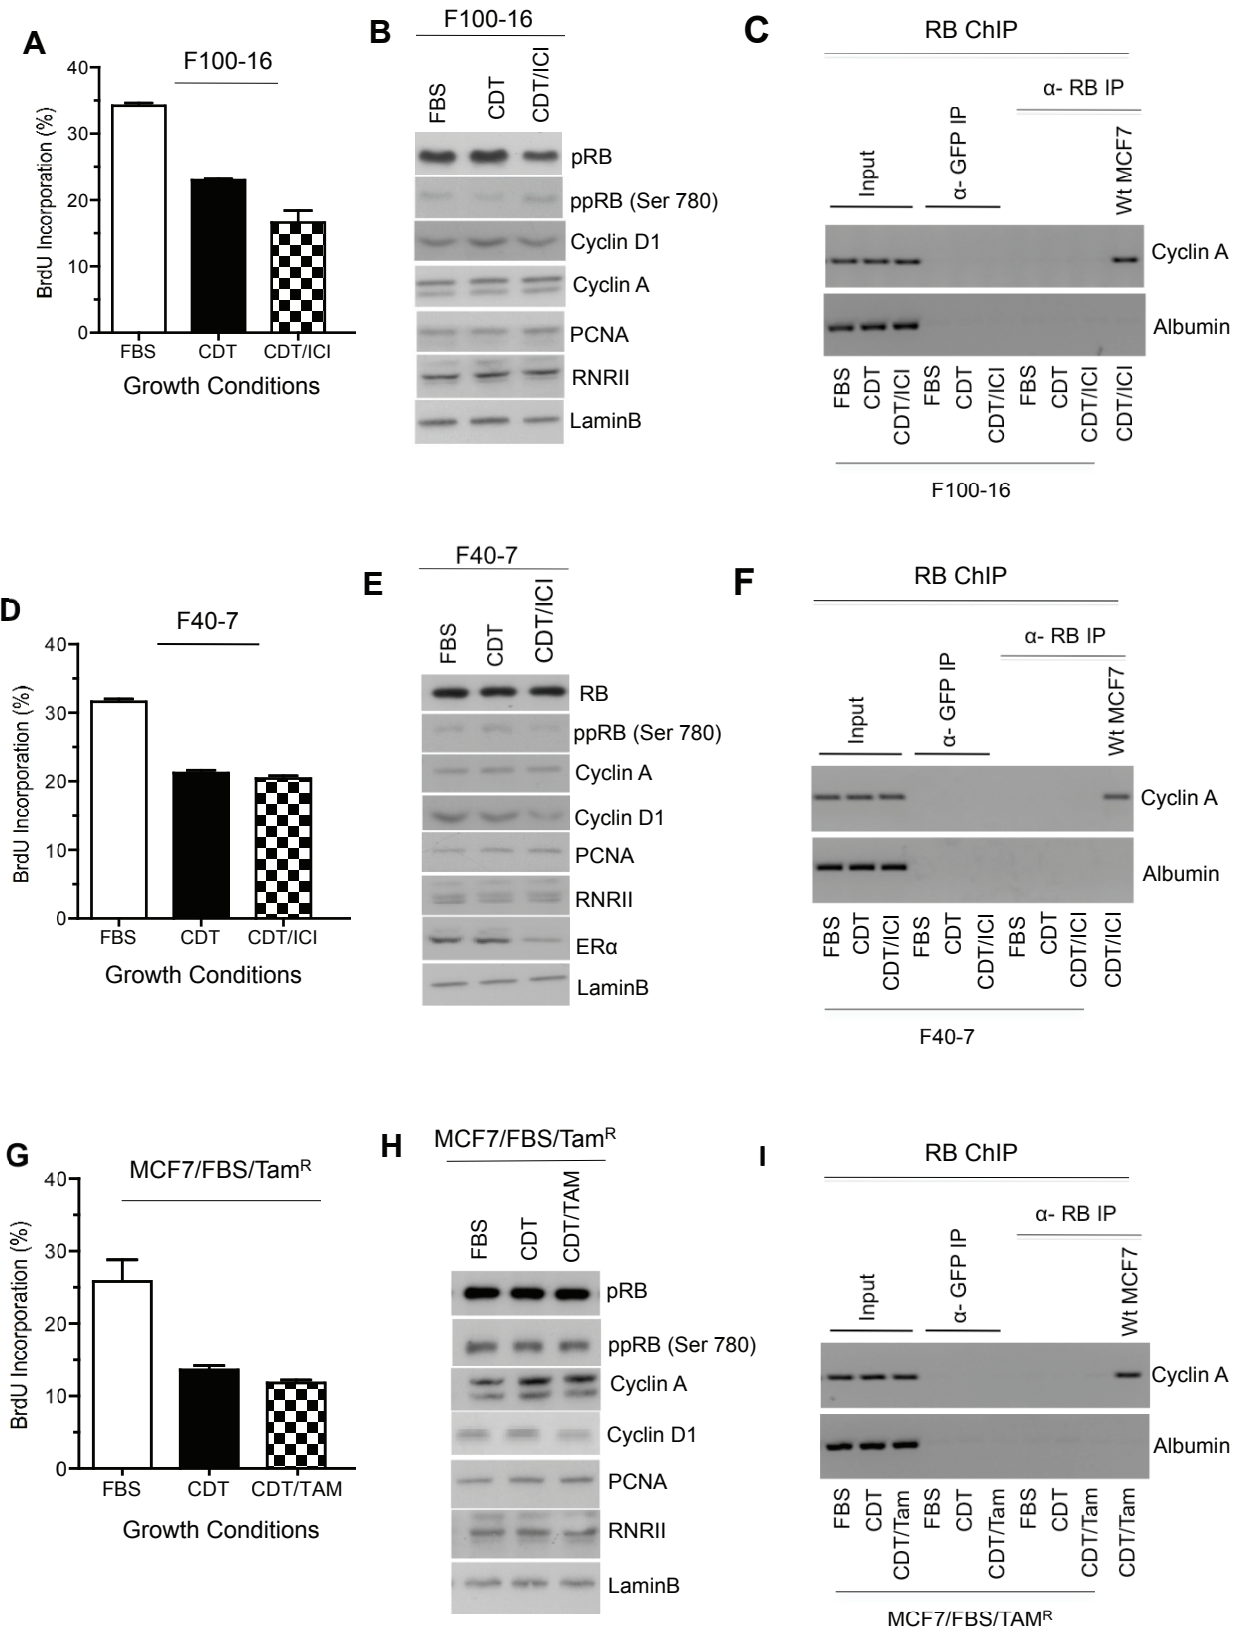

Supplement: NIHMS458802-supplement-supplementary_figure_1.pdf [file NIHMS458802-supplement-supplementary_figure_1.pdf]

## Supplemental Figure 2

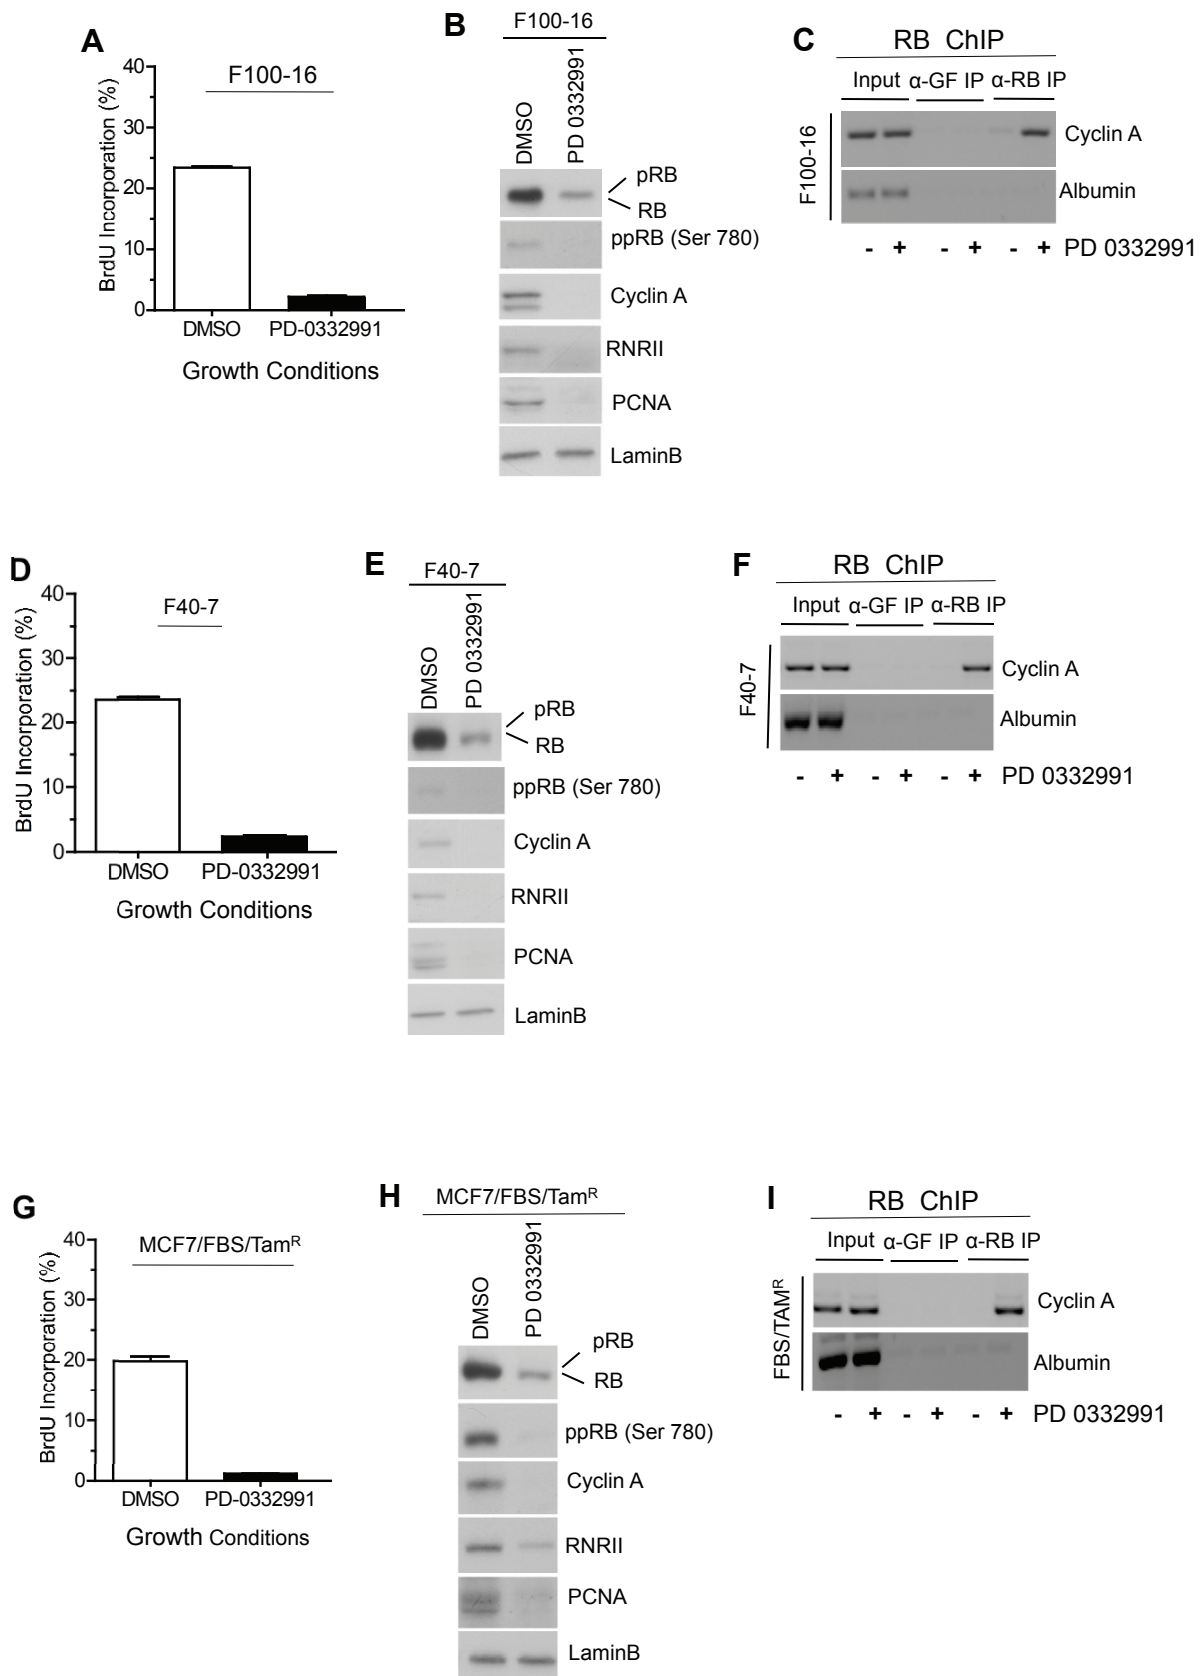

Supplement: NIHMS458802-supplement-supplementary_figure_2.pdf [file NIHMS458802-supplement-supplementary_figure_2.pdf]

### Supplemental Figure 3

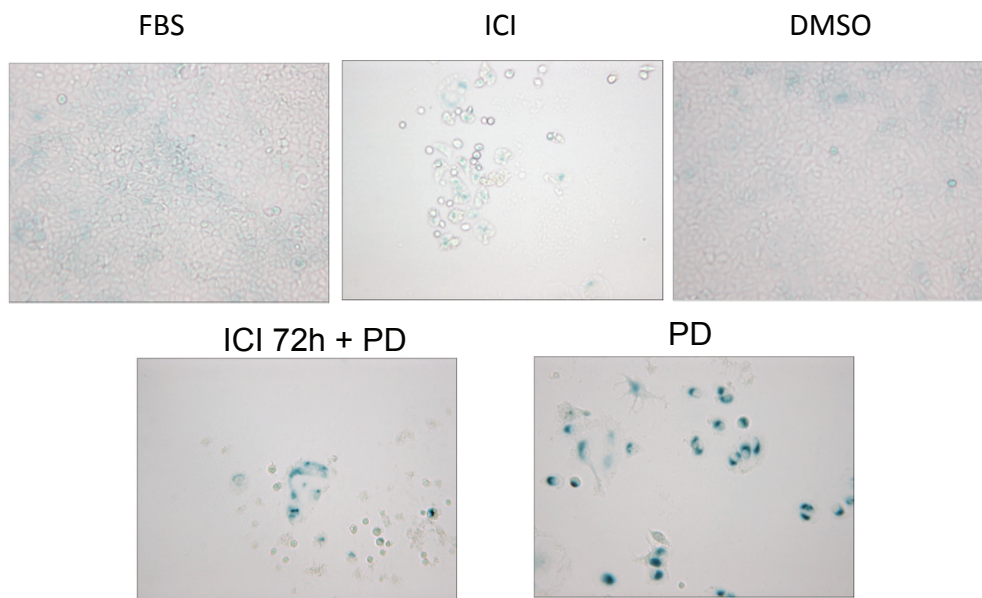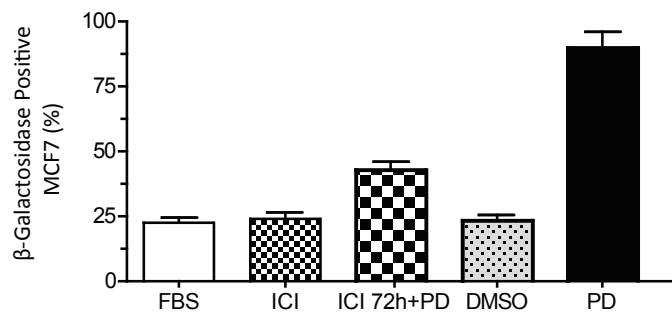

Supplement: NIHMS458802-supplement-supplementary_figure_3.pdf [file NIHMS458802-supplement-supplementary_figure_3.pdf]

# Supplemental Figure 4

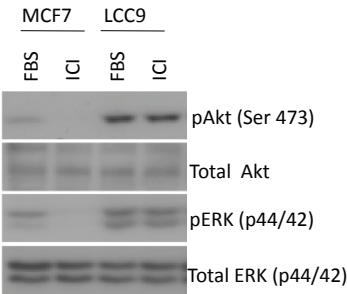

Supplement: NIHMS458802-supplement-supplementary_figure_4.pdf [file NIHMS458802-supplement-supplementary_figure_4.pdf]
